# Supplementary material for: Bacteria Isolated From the Antarctic Sponge Iophon sp. Reveals Mechanisms of Symbiosis in Sporosarcina, Cellulophaga, and Nesterenkonia
Source: Front Microbiol. 2021 Jun 10;12:660779. doi: 10.3389/fmicb.2021.660779 (PMC8222686; doi:10.3389/fmicb.2021.660779)
Supplement: Supplementary file 2 [file Table_1.XLSX]

## Sheet: Supplementary Table 1
Supplementary Table 1. Details of the metagenomes used in fragment recruitment analysis
SRA	Sequences	Sponge specie	Seawater		Reference	Others access information
SRX5546467	1663091	Iophon sp.		Antarctica	(Moreno-Pino et al. 2020)	https://doi.org/10.6084/m9.figshare.9851240.v1
SRX5546468	7148316	Myxilla sp	-	Antarctica	(Moreno-Pino et al. 2020)	https://doi.org/10.6084/m9.figshare.9851240.v1
SRX5546469	10470474	L. antarctica	-	Antarctica	(Moreno-Pino et al. 2020)	https://doi.org/10.6084/m9.figshare.9851240.v1
DRR066339	14914616	Mycale sp.	-	Japan:Kumamoto, Kamiamakusa, Ariake sea	-	-
ERR2756780	29544975	Tedania ignis	-	Caribbean and south Florida	-	PRJEB28366
ERR884059	34147045	Ianthella Basta	-	Australia	-	[dataset] (1969). Ianthella basta metagenomes, omics_ena_project, V1. https://www.ncbi.nlm.nih.gov/bioproject/?term=PRJEB9378.
SRR1171647	52046668	Haliclona cymaeformis	-	Shallow water of a bay in Hong Kong (22°16′32.96″N, 114°17′39.95″E)	(Tian et al. 2014)	-
SRR2064712	28978539	Lophophysema eversa	-	South China Sea-Deep-sea glass sponge	(Tian et al. 2016)	-
SRR3473501	20691782	Petrosia ficiformis	-	Mediterranean Sea	(Horn et al. 2016)	-
SRR3473948	16336213	Sarcotragus foetidus	-	Mediterranean Sea	(Horn et al. 2016)	-
SRR6214543	47367763	Aplysina aerophoba	-	North Atlantic Ocean	(Zhang et al. 2019)	GOLD Project ID Gp0055084
SRR8088660	51876100	Hexadella cf. Dedritifera H13	-	North Atlantic Ocean	(Zhang et al. 2019)	GOLD Project ID Gp0055084
SRR8088661	9395601	Hexadella cf. dedritifera H8	-	North Atlantic Ocean	(Zhang et al. 2019)	GOLD Project ID Gp0055084
SRR8088663	15114274	Hexadella cf. dedritifera B06	-	North Atlantic Ocean	(Zhang et al. 2019)	GOLD Project ID Gp0055084
SRR8092709	42420288	Aplysina aerophoba	-	North Atlantic Ocean	(Zhang et al. 2019)	GOLD Project ID Gp0055084
SRR8185552	18251614	-	Seawater	South Korea: Gwangyang-si	(Jo et al. 2019)	-
SRR8437077	41300843	-	Seawater	Northeast Subartic Pacific Ocean, Canada	-	Microbial Systems Ecology of Expanding Oxygen Minimum Zones in the Eastern Subtropical North Pacific Ocean (Proposal ID: 342 / 300638)
SRR8437216	48810273	-	Seawater	Saanich Inlet, British Columbia, Canada	-	Microbial Systems Ecology of Expanding Oxygen Minimum Zones in the Eastern Subtropical North Pacific Ocean (Proposal ID: 342 / 300638)
SRR8862135	56852563	-	Seawater	Ellis Fjord, Antarctic Ocean	-	Cavicchioli, Rick. Seasonal variation in Antarctic microbial communities: ecology, stability and susceptibility to ecosystem change. United States. doi:10.25585/1488109.
SRR8862808	58369748	-	Seawater	Antarctic Ocean	-	Cavicchioli, Rick. Seasonal variation in Antarctic microbial communities: ecology, stability and susceptibility to ecosystem change. United States. doi:10.25585/1488109.
SRR9648405	58025959	-	Seawater	Antarctic Ocean	-	Cavicchioli, Rick. Seasonal variation in Antarctic microbial communities: ecology, stability and susceptibility to ecosystem change. United States. doi:10.25585/1488109.
SRX5546470	5706551	-	Seawater	Antarctic Ocean- King George Island	(Moreno-Pino et al. 2020)	-
ERR1855290	2872243	-	Seawater	Arctic Ocean metagenomes from HLY1502	(Bundy et al. 2020)	-
SRR6713925	1961745	-	Seawater	Point Loma kelp forest, San Diego, California, USA (32˚39’59.56"N, 117˚14’50.62"W	(Minich et al. 2018)	-

## Sheet: Supplementary Table 2
Supplementary Table 2.Details of the genomes used in the comparative genomic analysis.
ID	Genus	Assembly level	GenBank assembly accession (latest)	Source	Genome size	Number of Contigs	Host-associated or free lliving	bacteria isolated from Antarctica
Strain E16_7	Nesterenkonia sp. strain E16_7	Contig	JADPRY000000000.1	Antarctic sponge	3,301,964	85	associated	yes
N1	Nesterenkonia sp. F	Contig	GCA_000220985.2	Hyper-saline lake	2,812,133	138	free	No
N2	Nesterenkonia alba DSM 19423	Contig	GCA_000421745.1	Black liquor treatment system of a cotton pulp mill.	2,591,866	36	free	No
N3	Nesterenkonia massiliensis NP1	Scaffold	GCA_000455245.1	Fecal flora of AIDS-infected French female	2,672,431	175	associated	No
N4	Nesterenkonia sp. AN1	Contig	GCA_000582475.1	Antarctic soil	3,040,130	42	free	yes
N5	Nesterenkonia jeotgali CD08_7	Contig	GCA_001483765.1	Duodenal mucosa of a CD patient	2,925,195	8	associated	No
N6	Nesterenkonia sp. PF2B19	Contig	GCA_001758425.2	Permafrost soil-Svalbard: Arctic	3,696,919	134	free	No
N7	Nesterenkonia sandarakina CG 35	Scaffold	GCA_003003175.1	Eastern desert of Egypt	3,224,976	58	free	No
N8	Nesterenkonia sp. M8	Contig	GCA_003595215.1	Soda lake sediment-Tanzania: Lake Magadi, Arusha region	2,524,489	11	free	No
N9	Nesterenkonia sp. RB2	Contig	GCA_003600155.1	Isolated from Populus euphratica in Xinjiang province, China	3,676,111	57	free	No
N10	Nesterenkonia aurantiaca DSM 27373	Scaffold	GCA_004364585.1	Antarctic soil, collected at Cape King (Antarctica	2,948,026	29	free	yes
Strain_E16_2	Cellulophaga strain sp. E16_2	Contig	JADPRW000000000.1	Antarctic sponge	4,964,169	165	associated	yes
C1	Cellulophaga algicola DSM 14237	Complete Genome	GCA_000186265.1	Surfaces of algal species from Antarctic marine coast and sea ice	4,888,353	1	associated	yes
C2	Cellulophaga lytica DSM 7489	Complete Genome	GCA_000190595.1	Marine beach mud in Limon, Costa Rica	3,765,936	1	free	No
C3	Cellulophaga baltica #4 1.0	Contig	GCA_000468575.1	Sea water Denmark: Oresund	4,613,605	42	free	No
C4	Cellulophaga baltica #13 1.0	Contig	GCA_000468595.1	Sea water Denmark: Oresund	4,486,477	41	free	No
C5	Cellulophaga baltica 18	Complete Genome	GCA_000468615.2	Denmark: Oresund,seawater	4,635,105	1	free	No
C6	Cellulophaga baltica NN016038	Complete Genome	GCA_000477035.2	Surface of Fucus serratus (seaweed)	4,560,540	1	associated	No
C7	Cellulophaga geojensis KL-A	Contig	GCA_000568425.1	Rotting seaweed in seawater	3,888,117	109	free	No
C8	Cellulophaga lytica HI1	Complete Genome	GCA_000750195.1	Seawater, USA:Hawaii	3,824,196	1	free	No
C9	Cellulophaga sp. E6 (2014)	Contig	GCA_000764435.1	Seaweed attached to rock near shore	4,420,065	72	associated	No
C10	Cellulophaga sp. Hel_I_12	Contig	GCA_000799565.1	missing	4,031,126	1	free	No
C11	Cellulophaga lytica DAU203	Complete Genome	GCA_001941605.1	Marine sediment, South Korea: Busan	3,952,957	1	free	No
C12	Cellulophaga sp. W5C	Contig	GCA_001999725.1	Seaweed,South Korea: Yeosu	3,803,581	51	associated	No
C13	Cellulophaga baltica DSM 24729	Scaffold	GCA_900102165.1	missing	4,718,566	66	free	No
C14	Cellulophaga fucicola DSM 24786	Scaffold	GCA_900119145.1	missing	3,922,041	26	free	No
C15	Cellulophaga tyrosinoxydans DSM 21164	Scaffold	GCA_900176415.1	Seawater sample from the eastern coast of Jeju Island in Korea	3,555,791	18	free	No
C16	Cellulophaga lytica CL8139	Contig	GCA_900197635.1	Red anemone (Actinia equine) surface, host-associated	3,764,820	87	associated	No
Strain_E16_3	Sporosarcina sp. strain E16_3	Contig	JADPRX000000000.1	Antarctic sponge	4,396,163	86	associated	yes
Strain_E16_8	Sporosarcina sp. strain E16_8	Contig	JADPRZ000000000.1	Antarctic sponge	4,027,960	139	associated	yes
S1	Sporosarcina newyorkensis 2681	Scaffold	GCA_000220335.1	Human blood	3,727,356	152	associated	No
S2	Sporosarcina ureae DSM 2281	Scaffold	GCA_000425545.1	missing	3,318,653	36	free	No
S3	Sporosarcina sp. EUR3 2.2.2	Contig	GCA_000484595.1	Permafrost isolates, unkown place	3,479,654	19	free	No
S4	Sporosarcina polymorpha D27	Contig	GCA_000586555.1	Sediment Taiwan: Taitung	3,633,869	65	free	No
Strain_E16_10	Nesterenkonia sp. strain E16_10	Scaffold	JADPSA000000000.1	Antarctic sponge	3,302,367	52	associated	yes
S5	Sporosarcina sp. ZBG7A	Contig	GCA_000813425.1	Soil, France: Zellenberg	3,534,579	78	free	No
S6	Sporosarcina koreensis S-K12	Scaffold	GCA_000826145.2	Soil in Suwon, Korea.	2,914,409	8	free	No
S7	Sporosarcina globispora DSM 4	Scaffold	GCA_001274725.1	soil, USA	5,673,948	34	free	No
S8	Sporosarcina koreensis Q1	Scaffold	GCA_001531445.1	Soil in Suwon, Korea.	4,340,200	538	free	No
S9	Sporosarcina sp. HYO08	Contig	GCA_001563475.1	Soil, South Korea: Seoul, self-healing concrete	3,051,703	32	free	No
S10	Sporosarcina psychrophila DSM 6497	Complete Genome	GCA_001590685.1	water	4,674,191	1	free	No
S11	Sporosarcina sp. P33	Complete Genome	GCA_002077155.1	Soil found near a side wall in Hibya park (Tokyo, Japan)	3,235,441	1	free	No
S12	Sporosarcina ureae S204	Complete Genome	GCA_002081995.1	Soil Pretoria, South Africa	3,362,333	1	free	No
S13	Sporosarcina ureae P17a	Complete Genome	GCA_002082015.1	Soil	3,412,428	1	free	No
S14	Sporosarcina ureae P8	Complete Genome	GCA_002101375.1	Soil, USA: Griffith Park in Los Angeles, CA	3,353,765	1	free	No
S15	Sporosarcina ureae P32a	Complete Genome	GCA_002109325.1	Soil, Public walkway near shopping center, Kumomi, Japan	3,382,744	1	free	No
S16	Sporosarcina sp. P37	Complete Genome	GCA_002109365.1	Soil, sample taken from the base of single tree in sidewalk along Rollins Rd. Evidence of many dogs, Boston, Mass.	3,335,999	1	free	No
S17	Sporosarcina sp. P10	Contig	GCA_002742995.1	Base of telephone pole adjacent to curb outs ide entrance to surfing area at Malibu	3,437,370	43	free	No
S18	Sporosarcina sp. P12 (2017)	Contig	GCA_002743035.1	Base of pine tree, Collie dog tied to tree near dog drinking fountain, Coronado Park	3,438,859	8	free	No
S19	Sporosarcina sp. P13	Contig	GCA_002743055.1	Base of tree near dog drinking fountain, Coronado Park, Coronado Island	3,318,423	85	free	No
S20	Sporosarcina sp. P16b	Contig	GCA_002743065.1	Base of oak tree, park-like setting near Strawberry Creek across from LSB Bldg	3,363,873	44	free	No
S21	Sporosarcina sp. P16a	Contig	GCA_002743075.1	Base of oak tree, park-like setting near Strawberry Creek across from LSB Bldg	3,293,369	46	free	No
S22	Sporosarcina sp. P17b	Contig	GCA_002743115.1	Base of tree near Student Union Bldg.	3,401,750	52	free	No
S23	Sporosarcina sp. P18a	Contig	GCA_002743135.1	Base of steps leading to terrace of Campanille	3,219,274	17	free	No
S24	Sporosarcina sp. P1	Contig	GCA_002743155.1	Base of eucalyptus tree at Shadow Ranch Park, a suburban public park in Canoga Park	3,306,654	48	free	No
S25	Sporosarcina sp. P19	Contig	GCA_002743165.1	Base of eucalyptus tree in Eucalyptus Grove	3,339,001	34	free	No
S26	Sporosarcina sp. P20a	Contig	GCA_002743175.1	Base of oak tree near north entrance to LSB Bldg	3,314,917	58	free	No
S27	Sporosarcina sp. P21c	Contig	GCA_002743185.1	Base of tree in front of Student Union Bldg. near Sather Gate	3,384,350	50	free	No
S28	Sporosarcina sp. P25	Contig	GCA_002743235.1	Accumulated dirt at foot of stairs near Artist's Center Bldg., Akasaka District	3,296,093	45	free	No
S29	Sporosarcina sp. P26b	Contig	GCA_002743245.1	Dirt walkway in business district, Akasaka District	3,382,782	66	free	No
S30	Sporosarcina sp. P2	Contig	GCA_002743255.1	Base of eucalyptus tree, near Vanowen St., Shadow Ranch Park	3,328,642	33	free	No
S31	Sporosarcina sp. P29	Contig	GCA_002743265.1	Dirt alley near Maruyama Cho shopping area	3,382,122	160	free	No
S32	Sporosarcina sp. P30	Contig	GCA_002743315.1	Front yard where neighbor's dogs are kept	3,313,921	72	free	No
S33	Sporosarcina sp. P31	Contig	GCA_002743325.1	Front yard where neighbor's dogs are kept	3,316,673	70	free	No
S34	Sporosarcina sp. P32b	Contig	GCA_002743335.1	Public walkway near shopping center	3,314,266	70	free	No
S35	Sporosarcina sp. P34	Contig	GCA_002743375.1	Base of shrub near apt., Ala Wai St.	3,262,144	23	free	No
S36	Sporosarcina sp. P35	Contig	GCA_002743395.1	Base of shrub at back entrance to private residence; dog is kept in back yard	3,252,669	75	free	No
S37	Sporosarcina sp. P3	Contig	GCA_002743415.1	Base of eucalyptus tree near dog training area at Reseda Park, a suburban public park	3,379,590	34	free	No
S38	Sporosarcina sp. P7	Contig	GCA_002743425.1	Rich garden soil from base of potted plant, private residence; owners do not keep dogs or cats	3,169,294	38	free	No
S39	Sporosarcina sp. PTS2304	Complete Genome	GCA_003351785.1	Feces, black-faced spoonbi	3,495,830	1	associated	No
S40	Sporosarcina sp. BI001-red	Contig	GCA_003384035.1	Ornithogenic soil	3,520,916	17	free	No
S41	Sporosarcina pasteurii BNCC 337394	Complete Genome	GCA_004379295.1	missing	3,253,966	1	free	No
S42	Sporosarcina pasteurii NCTC4822	Contig	GCF_900457495.1	missing	3,307,418	2	free	No

## Sheet: Supplementary Table 3 
Supplementary Table 3. Universal single copy genes used in this study.
Gene ID	COG ID	Eggnog annotation
g2	COG0228	rpsP 30S ribosomal protein S16
g3	COG0048	Small subunit ribosomal protein S12
g5	COG0049	Small subunit ribosomal protein S7
g6	COG0099	Small subunit ribosomal protein S13
g7	COG0093	Large subunit ribosomal protein L14
g9	COG0198	Large subunit ribosomal protein L24
g11	COG0052	Small subunit ribosomal protein S2
g13	COG0096	Small subunit ribosomal protein S8
g14	COG0092	Small subunit ribosomal protein S3
g15	COG0094	Large subunit ribosomal protein L5
g16	COG0292	rplT 50S ribosomal protein L20
g18	COG0185	Small subunit ribosomal protein S19
g21	COG0102	Large subunit ribosomal protein L13
g23	COG0097	Large subunit ribosomal protein L6
g27	COG0468	Recombinase A recA
g29	COG0335	rplS 50S ribosomal protein L19
g30	COG0090	Large subunit ribosomal protein L2
g33	COG0197	Large subunit ribosomal protein L16
g37	COG0184	Small subunit ribosomal protein S15
g38	COG0098	Small subunit ribosomal protein S5
g40	COG0256	Large subunit ribosomal protein L18
g42	COG0087	Large subunit ribosomal protein L3
g43	COG0081	Large subunit ribosomal protein L1

## Sheet: Supplementary Table 4
Supplementary Table 4. Top hits for sponge associated bacteria based on 16S rRNA.
Strain	Rank	Accession	Description	Organism	Query coverage (%)	Bit-Score	Identity (%)
E16_3	1	NR_113837	Sporosarcina globispora strain NBRC 16082 16S ribosomal RNA, partial sequence	Sporosarcina globispora	95.91	2651.34	99.80
E16_3	2	KF026325	Sporosarcina globispora strain DEM2 16S ribosomal RNA gene, partial sequence	Sporosarcina globispora	95.78	2647.73	99.80
E16_3	3	NR_029233	Sporosarcina globispora strain 785 16S ribosomal RNA, partial sequence	Sporosarcina globispora	99.22	2738-08-01	99.70
E16_3	4	AM491453	Bacillus sp. Nj-19 16S rRNA gene, strain Nj-19	Bacillus sp.	98.25	2711.75	99.70
E16_3	5	MG758003	Bacillus sp. strain M2_17 16S ribosomal RNA gene, partial sequence	Bacillus sp.	96.30	2654-04-01	99.70
E16_3	6	DQ339608	Sporosarcina sp. Enf36 16S ribosomal RNA gene, partial sequence	Sporosarcina sp.	94.68	2608.96	99.70
E16_3	7	CP014616	Sporosarcina psychrophila strain DSM 6497, complete genome	Sporosarcina psychrophila	100.00	2755.93	99.70
E16_3	8	KC160939	Bacillus sp. SS16.16 16S ribosomal RNA gene, partial sequence	Bacillus sp.	98.25	2707.24	99.70
E16_3	9	KC160674	Bacillus sp. SS9.15 16S ribosomal RNA gene, partial sequence	Bacillus sp.	98.25	2707.24	99.70
E16_3	10	KC160667	Bacillus sp. SS9.8 16S ribosomal RNA gene, partial sequence	Bacillus sp.	98.25	2707.24	99.70
E16_8	1	KF026325	Sporosarcina globispora strain DEM2 16S ribosomal RNA gene, partial sequence	Sporosarcina globispora	95.78	2661.26	100.00
E16_8	2	AM491453	Bacillus sp. Nj-19 16S rRNA gene, strain Nj-19	Bacillus sp.	98.25	2725.27	99.90
E16_8	3	CP014616	Sporosarcina psychrophila strain DSM 6497, complete genome	Sporosarcina psychrophila	100.00	2769.46	99.90
E16_8	4	KC160939	Bacillus sp. SS16.16 16S ribosomal RNA gene, partial sequence	Bacillus sp.	98.25	2720.77	99.90
E16_8	5	KC160674	Bacillus sp. SS9.15 16S ribosomal RNA gene, partial sequence	Bacillus sp.	98.25	2720.77	99.90
E16_8	6	NR_113837	Sporosarcina globispora strain NBRC 16082 16S ribosomal RNA, partial sequence	Sporosarcina globispora	95.91	2655.85	99.90
E16_8	7	JQ337215	Uncultured bacterium clone TE-3-F7 16S ribosomal RNA gene, partial sequence	Uncultured bacterium	93.64	2592.73	99.90
E16_8	8	AM237400	Sporosarcina globispora syn. Bacillus globisporus partial 16S rRNA gene, isolate OS-253	Sporosarcina globispora	95.00	2627.89	99.80
E16_8	9	JF970589	Sporosarcina globispora 16S ribosomal RNA gene, partial sequence	Sporosarcina globispora	99.74	2757.74	99.80
E16_8	10	NR_029233	Sporosarcina globispora strain 785 16S ribosomal RNA, partial sequence	Sporosarcina globispora	99.22	2743.31	99.80
E16_2	1	KU896972	Cellulophaga algicola strain IC F8.2 16S ribosomal RNA gene, partial sequence	Cellulophaga algicola	92.70	2520.59	100.00
E16_2	2	KU896970	Cellulophaga algicola strain PT G4.2 16S ribosomal RNA gene, partial sequence	Cellulophaga algicola	92.97	2527.81	100.00
E16_2	3	KU896967	Cellulophaga algicola strain PT E2.2 16S ribosomal RNA gene, partial sequence	Cellulophaga algicola	92.70	2520.59	100.00
E16_2	4	CP002453	Cellulophaga algicola DSM 14237, complete genome	Cellulophaga algicola	100.00	2718.96	100.00
E16_2	5	KU896966	Cellulophaga algicola strain AU G1.2 16S ribosomal RNA gene, partial sequence	Cellulophaga algicola	93.03	228279	99.90
E16_2	6	KU896968	Cellulophaga algicola strain PT E4.2 16S ribosomal RNA gene, partial sequence	Cellulophaga algicola	92.70	225204	99.90
E16_2	7	KU896960	Cellulophaga algicola strain IC F4.2 16S ribosomal RNA gene, partial sequence	Cellulophaga algicola	92.70	225204	99.90
E16_2	8	KU896957	Cellulophaga algicola strain MH F3.2 16S ribosomal RNA gene, partial sequence	Cellulophaga algicola	92.70	225204	99.90
E16_2	9	MG681179	Cellulophaga algicola strain PP F3.4 16S ribosomal RNA gene, partial sequence	Cellulophaga algicola	91.64	2485.43	99.90
E16_2	10	NR_074452	Cellulophaga algicola strain DSM 14237 16S ribosomal RNA, partial sequence	Cellulophaga algicola	100.00	2709.95	99.90
E16_7	1	GQ153973	Nesterenkonia sp. AN1 16S ribosomal RNA gene, partial sequence	Nesterenkonia sp.	98.15	2665.76	99.80
E16_7	2	NR_148812	Nesterenkonia aurantiaca strain CK5 16S ribosomal RNA, partial sequence	Nesterenkonia aurantiaca	97.88	2657.65	99.80
E16_7	3	AY571802	Nesterenkonia sp. 35/46 16S ribosomal RNA gene, partial sequence	Nesterenkonia sp.	91.74	2482.72	99.70
E16_7	4	AJ717365	Nesterenkonia sp. AC84 16S rRNA gene, isolate AC84	Nesterenkonia sp.	99.07	2681.99	99.70
E16_7	5	KC433536	Nesterenkonia sp. KDB 3 16S ribosomal RNA gene, partial sequence	Nesterenkonia sp.	95.77	2591.83	99.70
E16_7	6	KY053164	Actinobacteria bacterium strain IMCC25640 16S ribosomal RNA gene, partial sequence	Actinobacteria bacterium	94.45	2555.76	99.70
E16_7	7	GQ404474	Nesterenkonia sp. 110-8 16S ribosomal RNA gene, partial sequence	Nesterenkonia sp.	93.39	228887	99.60
E16_7	8	GQ404473	Nesterenkonia sp. 110-7 16S ribosomal RNA gene, partial sequence	Nesterenkonia sp.	93.39	228887	99.60
E16_7	9	MK841147	Nesterenkonia sp. strain I2216E03 16S ribosomal RNA gene, partial sequence	Nesterenkonia sp.	91.61	2478.21	99.60
E16_7	10	MK841286	Nesterenkonia sp. strain XMCCM04 16S ribosomal RNA gene, partial sequence	Nesterenkonia sp.	91.54	2476.41	99.60
E16_10	1	GQ153973	Nesterenkonia sp. AN1 16S ribosomal RNA gene, partial sequence	Nesterenkonia sp.	98.15	2665.76	99.80
E16_10	2	NR_148812	Nesterenkonia aurantiaca strain CK5 16S ribosomal RNA, partial sequence	Nesterenkonia aurantiaca	97.88	2657.65	99.80
E16_10	3	AY571802	Nesterenkonia sp. 35/46 16S ribosomal RNA gene, partial sequence	Nesterenkonia sp.	91.74	2482.72	99.70
E16_10	4	AJ717365	Nesterenkonia sp. AC84 16S rRNA gene, isolate AC84	Nesterenkonia sp.	99.07	2681.99	99.70
E16_10	5	KC433536	Nesterenkonia sp. KDB 3 16S ribosomal RNA gene, partial sequence	Nesterenkonia sp.	95.77	2591.83	99.70
E16_10	6	KY053164	Actinobacteria bacterium strain IMCC25640 16S ribosomal RNA gene, partial sequence	Actinobacteria bacterium	94.45	2555.76	99.70
E16_10	7	GQ404474	Nesterenkonia sp. 110-8 16S ribosomal RNA gene, partial sequence	Nesterenkonia sp.	93.39	228887	99.60
E16_10	8	GQ404473	Nesterenkonia sp. 110-7 16S ribosomal RNA gene, partial sequence	Nesterenkonia sp.	93.39	228887	99.60
E16_10	9	MK841147	Nesterenkonia sp. strain I2216E03 16S ribosomal RNA gene, partial sequence	Nesterenkonia sp.	91.61	2478.21	99.60
E16_10	10	MK841286	Nesterenkonia sp. strain XMCCM04 16S ribosomal RNA gene, partial sequence	Nesterenkonia sp.	91.54	2476.41	99.60

## Sheet: Supplementary Table 5
Supplementary Table 5. Enzyme activity pattern determined with the API-zym test.
No.	Enzymes	Substrates	Strain E16_3	Strain E16_8	Strain E16_2	Strain E16_7	Strain E16_10
1	Alkaline phosphatase	2-naphthy phosphate	P	P	P	N	P
2	Esterase lipase ( C4 )	2-naphthyl butyrate	N	N	N	N	P
3	Esterase lipase ( C8 )	2-naphthyl caprylate	P	N	N	P	P
4	Lipase ( C14 )	2-naphthyl myristate	N	N	N	N	N
5	Leucine arylamidase	L-leucyl-2-naphthylamide	P	P	P	P	P
6	Valine arylamidase	L-valyl-2-naphthylamide	P	P	P	P	P
7	Cystine arylamidase	L-cystyl-2-naphthylamide	N	N	N	N	N
8	Trypsin	N-benzoyl-DL-arginine-2-naphthylamide	N	N	N	N	N
9	a-chymotrypsin	N-glutaryl-phenylalanine-2-naphthylamide	N	N	N	N	N
10	Acid phosphatase	2-naphthyl phosphate	P	P	P	N	P
11	Naphthol-AS-BI-phosphohydrolase	Naphthol-AS-BI-phosphate	P	P	P	P	P
12	a-galactosidase	6-Br-2-naphthyl-aD-galactopyranoside	N	N	N	N	N
13	B-galatactosidase	2-naphthyl-BD-galactopyranoside	N	N	P	N	P
14	B-glucuronidase	Naphthol-AS-BI-BD-glucuronide	N	N	N	N	N
15	a-glucosidase	2-naphthyl-aD-glucorpyranoside	N	N	N	P	P
16	B-glucosidase	6-Br-2-naphthyl-BD-glucopyranoside	N	N	N	N	N
17	N-acetyl-B-glucosaminidase	1-naphthyl-N-acetyl-BD-glucosaminide	N	N	P	N	P
18	a-mannosidase	6-Br-2-naphthyl-aD-mannopyranoside	N	N	N	N	N
19	a-fucosidase	2-naphthyl-aL-fucopyranoside	N	N	N	N	N
20	Control	-	N	N	N	N	N
P=positive
N=negative

## Sheet: Supplementary Table _8
Supplementary Table 9. Genomic island predicted in sponge-associated Nesterenkonia sp. E16_10
Start	End	Size	GI Prediction Method	%GC
21.937	27.979	6.042	SIGI-HMM
31.984	36.814	4.83	SIGI-HMM
225.865	237.189	11.324	SIGI-HMM
590.873	598.123	7.25	SIGI-HMM
772.067	781.089	9.022	SIGI-HMM
1,731,223	1,738,381	7.158	SIGI-HMM
2,032,377	2,036,809	4.432	SIGI-HMM
2,246,003	2,251,188	5.185	SIGI-HMM
2,560,988	2,569,485	8.497	SIGI-HMM
3,219,180	3,230,178	10.998	SIGI-HMM
3,286,874	3,292,520	5.646	SIGI-HMM

## Sheet: Supplementary Table 6
Supplementary Table 6. Symbiotic related genes detected in the sponge-associated isolated.
		Cellulophaga algicola DSM 14237	Cellulophaga sp. Hel_I_12	Cellulophaga lytica DAU203	Cellulophaga sp. W5C	Cellulophaga baltica DSM 24729	Cellulophaga fucicola DSM 24786	Cellulophaga tyrosinoxydans DSM 21164	Cellulophaga lytica CL8139	Cellulophaga lytica DSM 7489	Cellulophaga baltica #4 1.0	Cellulophaga baltica #13 1.0	Cellulophaga baltica 18	Cellulophaga baltica NN016038	Cellulophaga geojensis KL-A	Cellulophaga lytica HI1	Cellulophaga sp. E6 (2014)	Nesterenkonia sp. strain E16_10	Cellulophaga strain sp. E16_2	Sporosarcina sp. strain E16_3	Nesterenkonia sp. strain E16_7	Sporosarcina sp. strain E16_8	Nesterenkonia sp. F	Nesterenkonia aurantiaca DSM 27373	Nesterenkonia alba DSM 19423	Nesterenkonia massiliensis NP1	Nesterenkonia sp. AN1	Nesterenkonia jeotgali CD08_7	Nesterenkonia sp. PF2B19	Nesterenkonia sandarakina CG 35	Nesterenkonia sp. M8	Nesterenkonia sp. RB2	Sporosarcina newyorkensis 2681	Sporosarcina psychrophila DSM 6497	Sporosarcina sp. P33	Sporosarcina ureae S204	Sporosarcina ureae P17a	Sporosarcina ureae P8	Sporosarcina ureae P32a	Sporosarcina sp. P37	Sporosarcina sp. P10	Sporosarcina sp. P12 (2017)	Sporosarcina sp. P13	Sporosarcina ureae DSM 2281	Sporosarcina sp. P16b	Sporosarcina sp. P16a	Sporosarcina sp. P17b	Sporosarcina sp. P18a	Sporosarcina sp. P1
Repeat	Tetratricopeptide (TPR) repeat	5	4	1	1	2	1	1	1	2	0	1	3	3	4	1	2	1	0	1	1	2	0	0	0	4	0	1	1	1	2	0	1	0	5	0	1	0	1	0	0	0	2	0	1	1	1	1	0
Repeat	Ankyrin repeat	3	1	1	1	4	0	1	1	0	2	2	3	2	2	0	1	2	3	0	2	1	0	0	0	2	0	1	0	2	1	0	1	2	2	0	0	0	1	0	0	0	1	0	1	1	1	1	3
Repeat	Uncharacterized protein YjbI, contains pentapeptide repeats	1	1	1	0	0	1	1	0	1	0	1	0	1	0	1	0	2	1	0	2	2	0	0	1	2	0	0	0	0	3	1	1	0	0	0	2	0	1	1	0	0	0	0	0	0	0	0	0
Repeat	LysM repeat	1	0	1	1	1	0	1	1	1	1	1	1	1	2	1	1	1	1	0	1	1	1	1	0	0	1	1	0	1	0	1	1	2	1	1	1	1	1	1	1	1	1	1	1	1	1	1	1
Repeat	HEAT repeat	2	1	1	0	0	0	0	1	0	0	0	0	0	0	0	2	3	1	3	3	4	1	3	4	9	3	4	7	5	3	6	1	2	0	0	0	0	1	2	1	1	2	0	3	0	2	0	0
Repeat	Outer membrane protein assembly factor BamB, contains PQQ-like beta-propeller repeat	5	3	2	3	6	2	4	2	2	6	4	9	4	2	2	3	0	6	3	0	2	0	0	0	0	1	0	0	0	1	0	1	2	5	2	2	3	3	2	2	2	2	2	3	3	3	3	3
Repeat	Uncaracterized surface protein containing fasciclin (FAS1) repeats	9	0	0	1	1	0	2	0	1	1	3	0	0	2	1	0	0	5	1	0	0	0	0	0	0	0	0	0	0	0	0	1	0	1	2	1	1	1	2	2	2	1	2	2	1	1	2	1
Repeat	Uncharacterized conserved protein RhaS, contains 28 RHS repeats	1	0	0	0	0	0	0	0	0	0	2	0	0	0	0	0	0	0	0	0	0	0	0	0	0	0	0	0	0	0	0	0	1	0	0	1	0	1	0	0	0	1	0	0	0	0	0	0
Repeat	Putative Zn-dependent protease, contains TPR repeats	1	0	0	0	0	0	0	0	0	0	0	0	0	0	0	0	0	0	0	0	0	0	0	0	0	0	0	0	0	0	0	0	0	0	0	0	0	0	0	0	0	0	0	0	0	0	0	0
Repeat	Secreted protein containing C-terminal beta-propeller domain distantly related to WD-40 repeats	2	2	2	2	3	3	3	3	2	3	3	3	3	2	2	3	0	2	1	0	1	0	0	0	0	0	0	0	0	0	0	1	1	1	1	1	1	1	1	1	1	1	1	1	1	1	1	1
Repeat	Leucine-rich repeat (LRR) protein	0	0	0	0	0	0	0	0	0	0	0	0	0	0	0	0	0	0	1	0	1	0	0	0	0	0	0	0	0	0	0	1	1	1	1	1	1	1	1	1	1	1	1	2	1	1	1	1
Repeat	Glucan-binding domain (YG repeat)	13	3	7	8	13	10	3	9	10	10	8	10	8	9	8	8	0	12	1	0	0	0	0	0	0	0	0	0	0	0	0	0	0	1	2	3	4	3	2	3	3	3	2	1	5	2	1	2
Restriction	Type I site-specific restriction-modification system, R (restriction) subunit and related helicases ...	50	29	32	37	50	39	37	35	32	47	44	44	49	33	33	48	3	51	5	3	5	3	3	4	3	3	4	3	3	3	3	5	10	7	6	5	7	8	8	5	5	5	6	7	8	7	8	8
Restriction	Restriction endonuclease S subunit	15	3	7	7	6	9	4	8	7	6	4	8	7	7	8	7	1	11	1	1	0	0	1	1	1	1	1	1	1	1	1	0	3	0	1	0	1	1	0	1	1	0	1	1	0	1	0	1
Restriction	Type II restriction/modification system, DNA methylase subunit YeeA	4	3	1	1	3	1	1	1	1	0	1	2	2	3	0	1	1	0	0	1	0	0	0	0	2	0	1	1	1	1	0	1	0	2	0	0	0	1	0	0	0	1	0	1	1	0	1	0
Restriction	5-methylcytosine-specific restriction endonuclease McrBC, GTP-binding regulatory subunit McrB	6	3	4	3	4	3	3	4	3	4	4	4	7	4	3	4	1	4	9	1	11	1	1	1	2	1	1	3	1	1	1	8	9	6	5	5	5	5	6	6	6	5	5	7	5	6	5	5
Restriction	5-methylcytosine-specific restriction endonuclease McrA	0	0	0	1	2	0	0	0	1	0	0	1	0	1	0	0	1	1	2	1	0	0	1	0	0	2	0	0	1	0	2	0	0	0	0	1	1	0	0	0	0	0	0	0	0	0	0	0
Restriction	Restriction endonuclease Mrr	4	1	2	4	3	4	1	2	3	4	4	5	2	2	2	3	1	3	0	1	0	0	1	0	1	1	0	1	2	1	0	2	0	0	1	0	1	1	0	2	2	1	1	0	1	1	0	1
Restriction	Predicted restriction endonuclease, HNH family	6	0	0	4	3	0	1	0	0	2	3	2	7	0	0	0	0	0	7	0	5	0	0	0	0	0	0	0	0	0	0	0	1	4	0	0	1	0	1	0	0	0	0	0	3	0	0	2
Restriction	Predicted restriction endonuclease	1		4	1	1	2	1	1	5	2	0	1	3	3	4	1	1	1	0	1	1	0	2	0	0	4	0	1	1	1	2	2	0	0	5	0	1	0	1	0	0	0	2	1	1	1	1	1
Restriction	Restriction endonuclease	3	6	6	8	2	0	3	1	0	0	3	0	4	1	2	2	1	7	3	1	3	0	0	1	5	2	1	1	13	0	2	3	6	3	4	6	3	7	0	3	3	0	6	5	4	1	0	6
Restriction	Predicted restriction endonuclease, Mrr-cat superfamily	1	1	0	0	0	0	0	0	0	0	0	0	0	0	0	0	0	0	0	0	0	0	0	0	1	0	0	0	0	0	1	0	0	0	0	0	0	0	0	0	0	0	0	0	0	0	0	0
Restriction	Antirestriction protein ArdC	0	0	0	0	0	0	0	0	0	1	0	0	0	0	0	0	0	0	1	0	0	1	0	0	0	0	0	0	0	0	0	0	1	1	0	1	1	0	1	0	0	0	0	0	0	0	0	1
Restriction	5-methylcytosine-specific restriction endonuclease McrBC, regulatory subunit McrC	0	0	0	0	0	0	0	0	0	0	0	0	0	0	0	0	3	0	0	3	0	0	0	0	1	0	0	0	1	0	0	0	0	0	0	0	0	0	0	0	0	0	0	0	0	0	0	0
Restriction	Endonuclease, Uma2 family (restriction endonuclease fold)	0	0	0	0	2	0	0	0	1	0	0	0	0	0	0	0	1	1	0	1	0	0	1	0	0	1	0	0	1	0	2	0	0	0	0	0	0	0	0	0	0	0	0	0	0	0	0	0
TA system	mRNA-degrading endonuclease, toxin component of the MazEF toxin-antitoxin module	6	7	3	3	4	3	5	3	3	4	4	4	4	3	3	4	1	7	0	1	0	1	1	0	0	1	1	1	1	0	0	0	0	0	0	0	0	0	0	0	0	0	0	0	0	0	0	0
TA system	Ca2+-binding protein, RTX toxin-related	0	0	0	0	1	0	0	0	0	0	0	0	0	0	0	0	4	2	1	4	2	1	2	4	0	3	1	2	7	0	1	4	3	0	0	0	1	10	0	0	0	0	0	1	1	4	0	1
Transposase	REP element-mobilizing transposase RayT	0	0	0	0	0	0	0	0	1	1	0	0	0	1	0	0	0	0	1	0	0	0	0	0	0	0	0	1	1	0	0	0	0	2	0	0	0	0	1	1	1	0	0	0	0	0	0	0
Transposase	Transposase InsO and inactivated derivatives	1	0	0	0	0	0	0	0	0	0	0	0	0	0	0	0	0	0	1	0	1	0	0	0	0	0	0	1	0	0	3	1	1	1	1	1	1	1	1	1	1	1	1	1	1	1	1	1
Transposase	Transposase and inactivated derivatives, IS30 family	19	6	1	2	10	0	0	0	0	10	4	2	14	2	0	3	11	7	3	12	10	2	8	24	22	16	3	21	15	3	5	3	9	11	10	1	11	1	7	3	3	4	9	3	1	2	1	4
Transposase	Transposase and inactivated derivatives	5	2	3	3	3	3	4	3	3	3	3	3	3	3	3	3	0	4	1	0	1	0	1	0	0	1	0	0	0	0	0	0	0	0	0	0	0	0	0	0	0	0	0	0	0	0	0	0
Transposase	Transposase and inactivated derivatives, IS5 family	13	4	1	1	8	1	1	1	1	8	4	3	12	2	1	2	6	5	4	6	8	0	7	20	12	5	1	11	4	1	2	3	7	12	15	0	11	5	3	4	4	4	13	3	1	1	1	3
Transposase	Transposase (or an inactivated derivative)	14	8	12	5	4	7	6	12	4	11	8	7	8	24	4	6	1	19	0	1	1	0	0	0	1	1	0	1	1	1	1	0	3	0	0	0	0	0	1	0	0	0	0	1	0	2	0	3
Transposase	IS4 transposase	0	0	0	0	0	0	0	0	0	0	0	0	0	0	0	0	0	0	0	0	1	1	0	1	3	2	0	1	4	0	0	1	0	0	0	0	0	0	0	0	0	0	0	0	0	0	0	0
Transposase	Transposase	0	0	0	0	0	0	0	0	0	0	0	0	1	0	0	1	1	0	4	1	1	0	0	0	0	0	0	1	0	0	0	0	2	0	1	1	1	1	1	1	1	2	1	1	1	1	1	1
Transposase	Transposase and inactivated derivatives, TnpA family	1	0	0	0	1	0	0	0	0	1	1	1	1	0	0	1	0	1	0	0	0	0	0	0	0	0	0	0	0	0	0	0	0	0	0	0	0	0	0	0	0	0	0	0	0	0	0	0
Transposase	Predicted transposase YdaD	1	0	0	0	0	2	0	0	0	0	0	0	0	0	0	0	0	1	0	0	0	0	0	1	0	0	0	1	0	0	0	0	0	0	0	0	0	0	0	0	0	1	0	0	0	0	0	0
Transport	ABC-type branched-chain amino acid transport system, ATPase component	0	0	0	0	0	0	0	0	0	0	0	0	0	0	0	0	0	0	2	0	3	0	0	0	0	0	0	1	0	0	1	1	4	0	2	1	1	1	0	2	2	1	2	3	1	1	2	1
Transport	Amino acid transporter	1	2	0	1	0	1	1	0	0	1	1	1	1	0	0	1	4	1	1	4	1	2	3	0	0	4	2	4	2	2	0	3	3	2	3	2	2	2	2	3	3	1	3	3	2	2	2	2
Transport	Branched-chain amino acid ABC-type transport system, permease component	0	0	0	0	0	0	0	0	0	0	0	0	0	0	0	0	0	0	2	0	3	0	0	0	0	0	0	1	0	0	1	1	4	0	2	1	1	1	0	2	2	1	2	2	1	1	2	1
Transport	Trk K+ transport system, NAD-binding component	4	3	3	3	5	4	4	3	3	6	5	5	5	3	3	5	2	5	2	2	2	1	2	1	1	2	2	1	2	1	1	1	1	1	1	1	1	1	1	1	1	1	1	1	1	1	1	1
Transport	Glycerol uptake facilitator and related aquaporins (Major Intrinsic Protein Family)	0	1	2	1	1	1	1	2	2	1	1	1	1	2	2	1	1	0	0	1	1	1	1	2	1	1	1	1	1	0	1	1	2	0	0	0	1	1	0	0	0	0	0	0	1	1	0	1
Transport	Small-conductance mechanosensitive channel	2	2	1	1	2	1	2	1	1	2	2	2	3	1	1	2	0	2	2	0	3	0	0	0	0	0	0	2	0	1	1	1	4	0	2	1	1	1	0	2	2	1	2	2	1	1	2	1
Transport	ABC-type branched-chain amino acid transport system, periplasmic component	8	6	5	5	8	6	5	5	5	8	8	8	8	5	5	9	1	8	2	1	2	2	1	1	1	1	1	1	1	1	1	1	1	1	1	1	1	1	1	1	1	1	1	1	1	1	1	1
Transport	Arsenite efflux pump ArsB, ACR3 family	1	1	1	1	1	1	1	1	1	1	1	1	1	1	1	1	4	1	0	4	0	2	2	1	1	2	2	4	3	2	2	0	0	0	0	0	0	0	0	0	0	0	0	0	0	0	0	0
Transport	Na+/H+ antiporter NhaD or related arsenite permease	1	1	1	1	1	1	1	1	1	1	1	1	1	1	1	1	0	1	2	0	2	0	0	1	0	0	0	0	0	0	0	0	1	2	3	3	2	3	2	5	5	2	3	3	2	5	1	3
Transport	Branched-chain amino acid permeases	1	1	1	1	1	1	1	1	1	1	1	1	1	1	1	1	0	1	2	0	2	0	0	0	0	0	0	0	0	0	0	3	3	2	3	4	3	3	2	3	3	2	3	3	3	3	3	3
Transport	ABC-type proline/glycine betaine transport system, ATPase component	0	0	0	0	0	0	0	0	0	0	0	0	0	0	0	0	2	0	2	2	3	1	2	0	1	2	1	1	1	2	1	1	3	2	2	2	2	2	2	2	2	1	2	2	2	2	2	2
Transport	ABC-type proline/glycine betaine transport system, permease component	0	0	0	0	0	0	0	0	0	0	0	0	0	0	0	0	4	0	2	4	2	2	4	0	2	4	2	2	2	4	2	1	4	2	2	2	2	2	2	2	2	1	2	2	2	2	2	2
Transport	Threonine/homoserine/homoserine lactone efflux protein	4	3	3	4	5	3	3	4	4	4	4	4	3	5	4	5	2	4	1	2	1	1	2	5	2	2	3	3	2	3	4	1	5	1	1	0	0	0	1	2	2	0	1	1	0	0	1	0
Transport	Choline-glycine betaine transporter	1	0	0	0	1	0	0	0	0	1	1	1	1	0	0	1	5	1	4	5	4	6	5	2	3	7	5	7	5	3	5	8	4	6	5	8	5	6	6	10	10	11	5	6	5	6	6	5
Transport	Predicted branched-chain amino acid permease (azaleucine resistance)	0	0	0	0	1	0	1	0	0	0	0	0	0	0	0	0	1	0	1	1	1	2	1	1	1	1	0	1	1	1	0	1	1	1	1	1	1	1	1	1	1	1	1	1	1	1	1	1
Transport	TRAP-type C4-dicarboxylate transport system, large permease component	0	0	0	0	1	0	1	0	0	1	1	1	1	0	0	1	3	1	2	3	4	1	3	1	0	2	3	5	3	2	9	5	0	7	5	5	4	2	3	4	4	6	5	4	5	4	3	5
Transport	L-lactate permease	1	1	0	0	0	0	1	0	0	0	0	0	0	0	0	0	0	1	0	0	0	0	0	0	0	0	0	1	0	1	1	1	0	0	0	1	0	0	0	0	0	0	0	1	0	0	1	0
Transport	TRAP-type C4-dicarboxylate transport system, periplasmic component	0	0	0	0	1	0	1	0	0	1	1	1	1	0	0	1	2	1	2	2	5	0	2	1	0	1	2	4	2	2	8	6	1	10	5	5	4	2	5	4	4	9	5	4	5	4	3	5
Transport	Branched-chain amino acid transport protein AzlD	0	0	0	0	0	0	0	0	0	0	0	0	0	0	0	0	0	0	0	0	0	1	0	0	0	0	0	0	0	0	0	0	0	0	0	0	0	0	0	0	0	0	0	0	0	0	0	0
Transport	Periplasmic glycine betaine/choline-binding (lipo)protein of an ABC-type transport system (osmoprotectant binding protein)	0	0	0	0	0	0	0	0	0	0	0	0	0	0	0	0	3	0	2	3	2	2	3	1	2	3	2	2	2	3	2	1	3	2	2	2	2	2	2	2	2	1	2	2	2	2	2	2
Transport	Large-conductance mechanosensitive channel	2	2	1	1	2	1	2	1	1	2	2	2	2	1	1	2	1	2	1	1	1	1	1	1	1	1	1	1	1	0	1	1	1	1	1	1	1	1	1	1	1	1	1	1	1	1	1	1
Transport	ABC-type proline/glycine betaine transport system, periplasmic component	0	0	0	0	0	0	0	0	0	0	2	0	0	0	0	1	1	0	1	1	3	1	1	1	0	1	1	0	0	1	1	2	2	1	1	2	1	1	1	1	1	1	1	1	1	1	2	1
Transport	TRAP-type uncharacterized transport system, periplasmic component	0	0	0	0	0	0	0	0	0	0	0	0	0	0	0	0	2	0	2	2	3	1	3	1	2	3	2	3	1	2	2	1	1	1	1	1	1	2	1	1	1	2	1	2	1	2	1	1
Transport	TRAP-type C4-dicarboxylate transport system, small permease component	0	0	0	0	1	0	1	0	0	1	1	1	1	0	0	1	2	1	2	2	3	0	1	1	0	0	0	3	2	2	7	4	0	6	4	4	4	2	2	3	3	5	4	3	5	4	2	5
Transport	Tripartite-type tricarboxylate transporter, receptor component TctC	0	0	0	0	0	0	0	0	0	0	0	0	0	0	0	0	1	0	2	1	1	1	1	2	1	1	1	2	2	1	4	1	2	2	1	2	0	1	2	2	2	8	1	1	1	2	0	2
Transport	NhaP-type Na+/H+ and K+/H+ antiporter with C-terminal TrkAC and CorC domains	1	1	1	1	0	1	0	1	1	0	0	0	0	1	1	0	0	1	0	0	0	0	0	0	0	0	1	1	2	0	0	0	0	0	0	0	0	0	0	0	0	0	0	0	0	0	0	0
Transport	ABC-type branched-chain amino acid transport system, permease component	0	0	0	0	0	0	0	0	0	0	0	0	0	0	0	0	0	0	2	0	3	0	0	0	0	0	0	1	0	0	1	1	3	0	2	1	1	1	0	2	2	2	2	2	1	1	2	1
Transport	Branched-chain amino acid transport protein	0	0	0	0	0	0	0	0	0	0	0	0	0	0	0	0	0	0	1	0	1	0	0	0	1	0	0	0	0	0	0	1	1	1	1	1	1	1	1	1	1	1	1	1	1	1	1	1
Transport	TRAP-type mannitol/chloroaromatic compound transport system, periplasmic component	0	0	0	0	0	0	0	0	0	0	0	0	0	0	0	0	0	0	0	0	0	0	0	0	1	0	0	0	0	0	0	0	0	1	0	0	1	0	1	0	0	0	0	0	1	0	0	1
Transport	TRAP-type mannitol/chloroaromatic compound transport system, large permease component	0	0	0	0	0	0	0	0	0	0	0	0	0	0	0	0	0	0	0	0	0	0	0	0	2	0	0	0	0	0	0	0	0	1	0	0	1	0	1	0	0	0	0	0	1	0	0	1
Transport	TRAP-type uncharacterized transport system, fused permease components	0	0	0	0	0	0	0	0	0	0	0	0	0	0	0	0	2	0	2	2	3	1	3	1	2	3	2	3	1	2	2	1	1	1	1	1	1	2	1	1	1	2	1	2	1	3	1	1
Transport	Threonine/homoserine efflux transporter RhtA	0	0	0	0	0	0	0	0	0	0	0	0	0	0	0	0	1	0	0	1	0	2	1	1	1	1	2	1	2	1	2	0	0	0	0	0	0	0	0	0	0	0	0	0	0	0	0	0
[truncated: 95 more columns]

## Sheet: Supplementary Table 7
Supplementary Table 7. Wilcoxon signed-rank test of symbiotic style genes among associated and free living genomes
		fligner.test (>0.05 not diff variances)	Wilcox test (two-sides)	Wilcox test (less)	Wilcox test (greater)	wilcox_effsize	wilcox_effsize (magnitude)
Among 73 genomes	ELPs	0.2077	0.9766	0.518	0.488	0.004	small
	Transposase	0.7833	0.4228	0.211	0.793	0.095	small
	Restriction	0.5235	0.0004	1	0.0002	0.414	moderate
	CRISPR	0.7218	0.8092	0.605	0.405	0.03	small
	TA system	0.5235	0.0782	0.039	0.962	0.207	small
Sporosarcina	ELPs	0.6049	0.8957	0.448	0.569	0.023	small
	Transposase	0.4156	0.013	0.994	0.006	0.0378	moderate
	Restriction	0.3248	0.01	0.996	0.005	0.392	moderate
	CRISPR	0.213	0.2516	0.89	0.126	0.179	small
	TA system	0.715866	0.3838	0.192	0.82	0.135	small
Cellulophaga	ELPs	0.28333	0.9559	0.478	0.566	0.0268	small
	Transposase	0.519327	0.1888	0.923	0.094	0.332	moderate
	Restriction	0.789151	0.5898	0.741	0.2949	0.144	small
	CRISPR	0.593803	0.6407	0.32	0.726	0.129	small
	TA system	0.529186	0.5241	0.774	0.262	0.169	small
Nesterenkonia	ELPs	0.0734024	0.8573	0.64	0.429	0.0779	small
	Transposase	0.00652723	0.2868	0.143	0.896	0.335	moderate
	Restriction	0.415287	0.038	0.988	0.019	0.624	large
	CRISPR	0.4795	0.5959	0.298	0.812	0.204	small
	TA system	0.815918	0.6529	0.326	0.736	0.156	small
*two-group wilcoxon test, p<0.05 for set associated vs free living

## Sheet: Supplementary Table 8
Supplementary Table 8. Abundance of COGs with roles in cold and osmotic response in the sponge-associated and free-living bacteria
					Cold shock proteins					Osmotic stress
					Heat shock 70 kDa protein	Binds to Cpn60 in the presence of Mg-ATP and suppresses the ATPase activity of the latter	Universal stress protein family	Cold-shock' DNA-binding domain	Prevents misfolding and promotes the refolding and proper assembly of unfolded polypeptides generated under stress conditions	ATPases associated with a variety of cellular activities, glycine betaine	Binding-protein-dependent transport system inner membrane component	choline transport, glycine betaine	BCCT, betaine/carnitine/choline family transporter, BCCT transporter (TC 2.A.15) family	Osmoprotectant binding protein	Choline dehydrogenase and related flavoprotein	Trehalose-phosphatase	sodium solute symporter (SSF) (TC 2.A.21) family	Na+/H+ antiporter 1	Sodium/hydrogen exchanger family	Na+/H+ antiporter subunit	NADH ubiquinone oxidoreductase subunit 5 (chain L) Multisubunit Na H antiporter, MnhA subunit	Proton-conducting membrane transporter
			Host-associated or free lliving	Antarctic isolated	COG0443	COG0234	COG0589	COG1278	COG0459	COG4175	COG1174	COG4176	COG1292	COG1732	COG2303	COG0380	COG0591	COG3004	COG0025	COG1320	COG1009	COG0651
Cellulophaga algicola DSM 14237	Surfaces of algal species from Antarctic marine coast and sea ice	4,888,353	associated	yes	1	1	14	4	1	0	0	0	1	0	4	1	3	0	4	0	0	0
Cellulophaga sp. Hel_I_12	missing	4,031,126	free	No	1	1	20	3	1	0	0	0	0	0	3	1	4	2	2	0	1	0
Cellulophaga lytica DAU203	Marine sediment, South Korea: Busan	3,952,957	free	No	2	1	5	4	1	0	0	0	0	0	3	1	5	0	2	0	0	0
Cellulophaga sp. W5C	Seaweed,South Korea: Yeosu	3,803,581	associated	No	2	1	5	4	1	0	0	0	0	0	3	1	4	0	2	0	0	0
Cellulophaga baltica DSM 24729	missing	4,718,566	free	No	1	1	12	4	1	0	0	0	1	0	4	1	3	0	3	0	1	0
Cellulophaga fucicola DSM 24786	missing	3,922,041	free	No	2	1	7	4	1	0	0	0	0	0	2	1	6	1	2	0	0	0
Cellulophaga tyrosinoxydans DSM 21164	Seawater sample from the eastern coast of Jeju Island in Korea	3,555,791	free	No	1	1	9	3	1	0	0	0	0	0	3	1	3	0	3	0	1	0
Cellulophaga lytica CL8139	Red anemone (Actinia equine) surface, host-associated	3,764,820	associated	No	2	1	7	4	1	0	0	0	0	0	2	1	5	0	2	0	0	0
Cellulophaga lytica DSM 7489	Marine beach mud in Limon, Costa Rica	3,765,936	free	No	2	1	7	4	1	0	0	0	0	0	2	1	5	0	2	0	0	0
Cellulophaga baltica #4 1.0	Sea water Denmark: Oresund	4,613,605	free	No	1	1	12	4	1	0	0	0	1	0	4	1	4	0	4	0	0	0
Cellulophaga baltica #13 1.0	Sea water Denmark: Oresund	4,486,477	free	No	1	1	13	4	1	0	0	0	1	0	4	1	3	0	3	0	0	0
Cellulophaga baltica 18	Denmark: Oresund,seawater	4,635,105	free	No	1	1	12	4	1	0	0	0	1	0	4	1	4	0	3	0	0	0
Cellulophaga baltica NN016038	Surface of Fucus serratus (seaweed)	4,560,540	associated	No	1	1	13	4	1	0	0	0	1	0	4	1	3	0	3	0	0	0
Cellulophaga geojensis KL-A	Rotting seaweed in seawater	3,888,117	free	No	2	1	7	4	1	0	0	0	0	0	2	1	5	0	2	0	0	0
Cellulophaga lytica HI1	Seawater, USA:Hawaii	3,824,196	free	No	2	1	7	4	1	0	0	0	0	0	2	1	5	0	2	0	0	0
Cellulophaga sp. E6 (2014)	Seaweed attached to rock near shore	4,420,065	associated	No	1	1	12	4	1	0	0	0	1	0	4	1	3	0	3	0	0	0
Nesterenkonia sp. strain E16_10	Antarctic sponge	3,302,367	associated	yes	1	1	11	2	2	1	4	0	5	3	3	1	2	0	1	3	3	4
Cellulophaga strain sp. E16_2	Antarctic sponge	4,964,169	associated	yes	1	1	14	4	1	1	0	0	1	2	5	1	3	0	4	0	0	0
Sporosarcina sp. strain E16_3	Antarctic sponge	4,396,163	associated	yes	1	1	3	2	1	1	2	0	4	0	2	0	2	0	1	2	2	2
Nesterenkonia sp. strain E16_7	Antarctic sponge	3,301,964	associated	yes	1	1	11	2	2	1	4	0	5	3	3	1	2	0	1	3	3	4
Sporosarcina sp. strain E16_8	Antarctic sponge	4,027,960	associated	yes	2	1	3	2	1	1	2	0	4	2	2	0	1	0	1	2	2	2
Nesterenkonia sp. F	Hyper-saline lake	2,812,133	free	No	1	1	4	2	2	1	2	0	6	2	2	1	3	0	0	2	2	2
Nesterenkonia aurantiaca DSM 27373	Antarctic soil, collected at Cape King (Antarctica	2,948,026	free	yes	1	1	10	2	2	1	4	0	5	3	2	1	1	0	1	3	3	4
Nesterenkonia alba DSM 19423	Black liquor treatment system of a cotton pulp mill.	2,591,866	free	No	1	1	3	2	2	1	0	1	2	1	0	1	2	0	0	3	3	4
Nesterenkonia massiliensis NP1	Fecal flora of AIDS-infected French female	2,672,431	associated	No	1	1	2	2	2	1	2	0	3	2	1	1	2	0	0	3	2	2
Nesterenkonia sp. AN1	Antarctic soil	3,040,130	free	yes	1	1	10	2	2	1	4	1	7	3	4	1	1	0	1	3	4	4
Nesterenkonia jeotgali CD08_7	Duodenal mucosa of a CD patient	2,925,195	associated	No	1	1	9	2	2	1	2	0	5	2	3	1	2	0	1	3	3	4
Nesterenkonia sp. PF2B19	Permafrost soil-Svalbard: Arctic	3,696,919	free	No	1	1	5	2	2	0	2	0	7	2	1	1	9	0	0	3	4	6
Nesterenkonia sandarakina CG 35	Eastern desert of Egypt	3,224,976	free	No	1	1	8	2	2	0	2	0	5	2	2	1	0	0	1	3	3	4
Nesterenkonia sp. M8	Soda lake sediment-Tanzania: Lake Magadi, Arusha region	2,524,489	free	No	1	1	9	2	2	1	4	0	3	3	2	1	5	0	0	3	3	4
Nesterenkonia sp. RB2	Isolated from Populus euphratica in Xinjiang province, China	3,676,111	free	No	1	1	4	2	2	1	2	1	5	2	3	1	3	0	0	3	3	4
Sporosarcina newyorkensis 2681	Human blood	3,727,356	associated	No	1	1	2	3	1	2	1	1	8	1	3	0	4	0	2	2	2	2
Sporosarcina psychrophila DSM 6497	water	4,674,191	free	No	1	1	4	2	2	1	4	0	4	3	2	0	2	0	2	1	2	2
Sporosarcina sp. P33	Soil found near a side wall in Hibya park (Tokyo, Japan)	3,235,441	free	No	1	1	3	3	1	2	2	0	6	2	1	0	2	0	3	2	2	2
Sporosarcina ureae S204	Soil Pretoria, South Africa	3,362,333	free	No	1	1	2	3	1	1	2	0	5	2	5	0	1	0	3	2	2	2
Sporosarcina ureae P17a	Soil	3,412,428	free	No	1	2	3	3	3	2	2	1	8	2	7	0	3	0	3	2	2	2
Sporosarcina ureae P8	Soil, USA: Griffith Park in Los Angeles, CA	3,353,765	free	No	1	1	3	3	1	1	2	0	5	2	7	0	4	0	1	2	2	2
Sporosarcina ureae P32a	Soil, Public walkway near shopping center, Kumomi, Japan	3,382,744	free	No	1	1	5	3	1	1	2	0	6	2	7	0	4	0	3	2	2	2
Sporosarcina sp. P37	Soil, sample taken from the base of single tree in sidewalk along Rollins Rd. Evidence of many dogs, Boston, Mass.	3,335,999	free	No	1	1	3	3	1	1	2	0	6	2	3	0	2	0	3	2	2	2
Sporosarcina sp. P10	Base of telephone pole adjacent to curb outs ide entrance to surfing area at Malibu	3,437,370	free	No	2	1	3	3	1	1	2	0	10	2	5	0	3	0	3	2	2	2
Sporosarcina sp. P12 (2017)	Base of pine tree, Collie dog tied to tree near dog drinking fountain, Coronado Park	3,438,859	free	No	2	1	3	3	1	1	2	0	10	2	5	0	3	0	3	2	2	2
Sporosarcina sp. P13	Base of tree near dog drinking fountain, Coronado Park, Coronado Island	3,318,423	free	No	1	2	2	3	3	1	1	1	11	1	1	0	5	0	1	2	2	2
Sporosarcina ureae DSM 2281	missing	3,318,653	free	No	1	1	2	3	1	1	2	0	5	2	5	0	1	0	3	2	2	2
Sporosarcina sp. P16b	Base of oak tree, park-like setting near Strawberry Creek across from LSB Bldg	3,363,873	free	No	2	1	4	3	1	1	2	0	6	2	5	0	3	0	1	2	2	2
Sporosarcina sp. P16a	Base of oak tree, park-like setting near Strawberry Creek across from LSB Bldg	3,293,369	free	No	1	1	3	3	1	1	2	0	5	2	8	0	2	0	1	2	2	2
Sporosarcina sp. P17b	Base of tree near Student Union Bldg.	3,401,750	free	No	1	1	5	3	1	1	2	0	6	2	7	0	3	0	3	2	2	2
Sporosarcina sp. P18a	Base of steps leading to terrace of Campanille	3,219,274	free	No	1	1	4	3	1	1	2	0	6	2	4	0	4	0	1	2	2	2
Sporosarcina sp. P1	Base of eucalyptus tree at Shadow Ranch Park, a suburban public park in Canoga Park	3,306,654	free	No	1	1	4	3	1	1	2	0	5	2	8	0	2	0	1	2	2	2
Sporosarcina sp. P19	Base of eucalyptus tree in Eucalyptus Grove	3,339,001	free	No	1	1	2	3	1	1	2	0	7	2	5	0	4	0	3	2	2	2
Sporosarcina sp. P20a	Base of oak tree near north entrance to LSB Bldg	3,314,917	free	No	1	1	3	3	1	1	2	0	6	2	8	0	3	0	2	2	2	2
Sporosarcina sp. P21c	Base of tree in front of Student Union Bldg. near Sather Gate	3,384,350	free	No	1	1	3	3	1	1	2	0	6	2	7	0	4	0	1	2	2	2
Sporosarcina sp. P25	Accumulated dirt at foot of stairs near Artist's Center Bldg., Akasaka District	3,296,093	free	No	1	1	3	3	1	1	2	0	4	2	8	0	2	0	1	2	2	2
Sporosarcina sp. P26b	Dirt walkway in business district, Akasaka District	3,382,782	free	No	1	1	5	3	1	1	2	0	7	2	9	0	4	0	3	2	2	2
Sporosarcina sp. EUR3 2.2.2	Permafrost isolates, unkown place	3,479,654	free	No	1	1	3	2	1	0	1	0	1	2	1	0	3	0	1	1	1	1
Sporosarcina sp. P2	Base of eucalyptus tree, near Vanowen St., Shadow Ranch Park	3,328,642	free	No	2	1	4	3	1	1	2	0	6	2	4	0	4	0	1	2	2	2
Sporosarcina sp. P29	Dirt alley near Maruyama Cho shopping area	3,382,122	free	No	1	1	4	3	3	1	2	0	5	2	7	0	3	0	3	2	2	2
Sporosarcina sp. P30	Front yard where neighbor's dogs are kept	3,313,921	free	No	1	2	4	3	3	1	2	0	5	2	7	0	3	0	3	2	2	2
Sporosarcina sp. P31	Front yard where neighbor's dogs are kept	3,316,673	free	No	1	2	4	3	3	1	2	0	5	2	7	0	3	0	3	2	2	2
Sporosarcina sp. P32b	Public walkway near shopping center	3,314,266	free	No	1	2	4	3	3	1	2	0	5	2	7	0	3	0	3	2	2	2
Sporosarcina sp. P34	Base of shrub near apt., Ala Wai St.	3,262,144	free	No	1	1	4	3	1	1	2	0	6	2	4	0	4	0	1	2	2	2
Sporosarcina sp. P35	Base of shrub at back entrance to private residence; dog is kept in back yard	3,252,669	free	No	1	1	3	3	1	1	2	0	6	2	3	0	2	0	3	2	2	2
Sporosarcina sp. P3	Base of eucalyptus tree near dog training area at Reseda Park, a suburban public park	3,379,590	free	No	1	2	3	3	3	3	2	1	7	2	8	0	4	0	3	2	2	2
Sporosarcina sp. P7	Rich garden soil from base of potted plant, private residence; owners do not keep dogs or cats	3,169,294	free	No	1	1	4	3	1	1	2	0	6	2	4	0	1	0	1	2	2	2
Sporosarcina sp. PTS2304	Feces, black-faced spoonbi	3,495,830	associated	No	1	1	5	3	2	1	1	1	4	1	3	0	1	0	3	2	2	2
Sporosarcina polymorpha D27	Sediment Taiwan: Taitung	3,633,869	free	No	1	1	2	3	1	2	2	1	5	2	2	0	5	0	3	2	2	2
Sporosarcina sp. BI001-red	Ornithogenic soil	3,520,916	free	No	1	1	2	3	1	1	2	0	5	2	4	0	5	0	3	2	2	2
Sporosarcina pasteurii BNCC 337394	missing	3,253,966	free	No	1	1	2	2	1	3	2	0	6	2	0	0	5	0	1	2	2	2
Sporosarcina pasteurii NCTC4822	missing	3,307,418	free	No	1	1	2	2	1	3	2	0	6	2	0	0	5	0	1	2	2	2
Sporosarcina sp. ZBG7A	Soil, France: Zellenberg	3,534,579	free	No	1	1	2	3	1	2	2	1	6	2	2	0	5	0	3	2	2	2
Sporosarcina koreensis S-K12	Soil in Suwon, Korea.	2,914,409	free	No	1	1	2	2	1	1	1	0	5	1	5	0	1	0	3	2	2	2
Sporosarcina globispora DSM 4	soil, USA	5,673,948	free	No	1	1	2	3	1	0	1	0	3	1	2	0	6	0	0	1	2	1
Sporosarcina koreensis Q1	Soil in Suwon, Korea.	4,340,200	free	No	1	1	4	3	1	1	1	0	4	1	1	0	4	0	1	2	2	2
Sporosarcina sp. HYO08	Soil, South Korea: Seoul, self-healing concrete	3,051,703	free	No	1	1	1	4	1	1	1	0	3	2	1	0	2	0	0	2	1	2

## Sheet: Supplementary Table 9
Supplementary Table 9. Wilcoxon signed-rank test of COGs with roles in cold and osmotic response in the sponge-associated and free-living bacteria.			Less non antarctic than antarctic
		Wilcox test (two-sides)	Wilcox test (less)	Wilcox test (greater)
COG1320	Na+/H+ antiporter subunit	0.00337104	0.00168552	0.99841
COG0589	Universal stress protein family	0.011404	0.005702	0.994582
COG1174	Binding-protein-dependent transport system inner membrane component	0.0429254	0.0214627	0.979514
COG0459	Prevents misfolding and promotes the refolding and proper assembly of unfolded polypeptides generated under stress conditions	0.383063	0.191531	0.818426
COG3004	Na+/H+ antiporter 1	0.520101	0.260051	0.745712
COG0380	Trehalose-phosphatase	0.554016	0.277008	0.728965
COG0651	Proton-conducting membrane transporter	0.559302	0.279651	0.726551
COG1009	NADH ubiquinone oxidoreductase subunit 5 (chain L) Multisubunit Na H antiporter, MnhA subunit	0.639535	0.319767	0.70222
COG1278	Cold-shock' DNA-binding domain	0.762215	0.381107	0.629331
COG2303	Choline dehydrogenase and related flavoprotein	0.929122	0.464561	0.547204
COG1292	BCCT, betaine/carnitine/choline family transporter, BCCT transporter (TC 2.A.15) family	0.758916	0.628304	0.379458
COG0443	Heat shock 70 kDa protein	0.762215	0.629331	0.381107
COG0234	Binds to Cpn60 in the presence of Mg-ATP and suppresses the ATPase activity of the latter	0.383063	0.818426	0.191531
COG4176	choline transport, glycine betaine	0.290882	0.859578	0.145441
COG0591	sodium solute symporter (SSF) (TC 2.A.21) family	0.0564607	0.973037	0.0282303
COG1732	Osmoprotectant binding protein	0.052702	0.974828	0.026351
COG0025	Sodium/hydrogen exchanger family	0.0327228	0.98447	0.0163614
COG4175	ATPases associated with a variety of cellular activities, glycine betaine	0.011404	0.994582	0.005702
*two-group wilcoxon test, p<0.05 for set antarctic vs non-antarctic

[truncated: 6 more sheets: Supplementary Table 10, Supplementary Table 11, Supplementary Table 12, Supplementary Table 13, Supplementary Table 14, Supplementary Table 15]
